# Supplementary material for: Robust nontarget DNA-triggered catalytic hairpin assembly amplification strategy for the improved sensing of microRNA in complex biological matrices
Source: Royal Society of Chemistry journal article supplement (doi:10.1039/d3an01411h), 2023-01-01
Supplement: d3an01411h1.pdf [file d3an01411h1.pdf]

## Supplementary Information

**Table S1** Sequences of DNAs and RNAs used in this work

| Name           | Sequence (5' to 3')             |
|----------------|---------------------------------|
| DNA1           | TCAACATCAGTCTGATAAGCTA          |
| DNA2           | ATCAGACTGA                      |
| MB1            | FAM-GACCTTCAGTCTGATAGGTC-BHQ1   |
| MB2            | BHQ1-GACCTATCAGACTGAAGGTC-FAM   |
| miRNA-21       | UAGCUUAUCAGACUGAUGUUGA          |
| DNA-21         | TAGCTTATCAGACTGATGTTGA          |
| miRNA-155      | UUA AUGCUAAUCGUGAUAGGGG         |
| SM-microRNA-21 | UAGCUUAUG <u>A</u> GACUGAUGUUGA |
| Random DNA     | CCCCTATCACGATTAGCATTA           |

**Table S2** Comparison of the performance of recently reported fluorometric assays for the detection of miRNA-21 based on nucleic acid amplification technique.

| Materials                                                                                    | Ampl. <sup>a</sup>         | LOD <sup>b</sup>                                | Linear range                                           | SNP <sup>c</sup> | Imaging <sup>d</sup> | Ref.        |
|----------------------------------------------------------------------------------------------|----------------------------|-------------------------------------------------|--------------------------------------------------------|------------------|----------------------|-------------|
| DNA1 and DNA2 (label-free),<br>MB1 and MB2 (labeled with FAM and BHQ1)                       | CHA                        | 0.76 pM in<br>buffer<br>0.12 pM in<br>10% serum | 0.1~1000 pM in<br>buffer<br>0.1~100 pM in<br>10% serum | Yes              | Yes                  | Our<br>work |
| H0 (label-free), H1, H2, H3, H4, each labeled with<br>FAM and BHQ1                           | CHA                        | 0.025 nM                                        | 0.05~6.4 nM                                            | Yes              | –                    | [39]        |
| DNA tetrahedron, cDNA, iDNA, bDNA, Cy3-<br>labeled H1, Cy5-labeled H2                        | CHA                        | 26 pM                                           | 5~20 nM                                                | –                | Yes                  | [41]        |
| Cy3-labeled DNA tetrahedron 1, Cy5-labeled DNA<br>tetrahedron 2                              | CHA                        | 120 pM                                          | 0.1~10 nM                                              | Yes              | Yes                  | [40]        |
| Gold nanoparticle, FAM-labeled H1, label-free H2                                             | CHA                        | 10 pM                                           | 0.1nM~10 nM                                            | Yes              | –                    | [45]        |
| Polystyrene microspheres, 3-D DNA walking<br>machine                                         | CHA                        | 41pM                                            | 50 pM~20 nM                                            | –                | –                    | [47]        |
| Gold nanoparticles, FAM-H1, TAMAR-H2                                                         | CHA                        | 3.7 pM                                          | 10 pM~1 nM                                             | –                | Yes                  | [43]        |
| Carbon dots (CD), FAM-ssDNA, T7 exonuclease                                                  | T7 <sup>e</sup>            | 1 pM                                            | 0.05~10 nM                                             | Yes              | –                    | [46]        |
| AuNPs, ZIF-8, locking strand, Zn <sup>2+</sup> -dependent<br>DNAzyme-embedded walking strand | DNA<br>walker <sup>f</sup> | 19.4 pM                                         | 30 pM~50 nM                                            | Yes              | Yes                  | [44]        |

<sup>a</sup> Amplification strategy; <sup>b</sup> Limit of detection; <sup>c</sup> Single nucleotide polymorphism; <sup>d</sup> Intracellular imaging; <sup>e</sup> T7 exonuclease-assisted enzymatic amplification; <sup>f</sup> DNA walker-based amplification

Table S3 Detection of miR-21 in diluted serum samples.

| Sample | Spiked (pM) | Detected (pM) | Recovery (%) | RSD (%) |
|--------|-------------|---------------|--------------|---------|
| 1      | 5           | 4.47          | 89.4         | 1.5     |
| 2      | 10          | 11.56         | 115.6        | 2.0     |
| 3      | 50          | 43.65         | 87.3         | 1.3     |
| 4      | 100         | 109           | 109          | 1.1     |

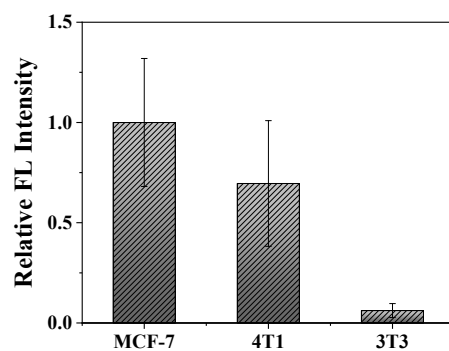

Fig. S1 Relative fluorescence intensity of MCF-7, 4T1, and 3T3 cells after being incubated with the DNA probes.
